# Supplementary material for: A mechanism for temporary bioadhesion
Source: PubMed Central journal article supplement (PMC6410801; doi:10.1073/pnas.1814230116), 2019-02-19
Supplement: pnas.1814230116.sapp.pdf [file pnas.1814230116.sapp.pdf]

## Supplementary Information for A Mechanism for Temporary Bioadhesion

Julia Wunderer, Birgit Lengerer, Robert Pjeta, Philip Bertemes, Leopold Kremser, Herbert Lindner, Thomas Ederth, Michael W. Hess, David Stock, Willi Salvenmoser, Peter Ladurner

Corresponding author:

Peter Ladurner

Email: [peter.ladurner@uibk.ac.at](mailto:peter.ladurner@uibk.ac.at)

### **This PDF file includes:**

Figs. S1 to S19

Tables S1 to S3

Captions for movies S1 to S9

### **Other supplementary materials for this manuscript include the following:**

Caption for Datasets D1 - D3

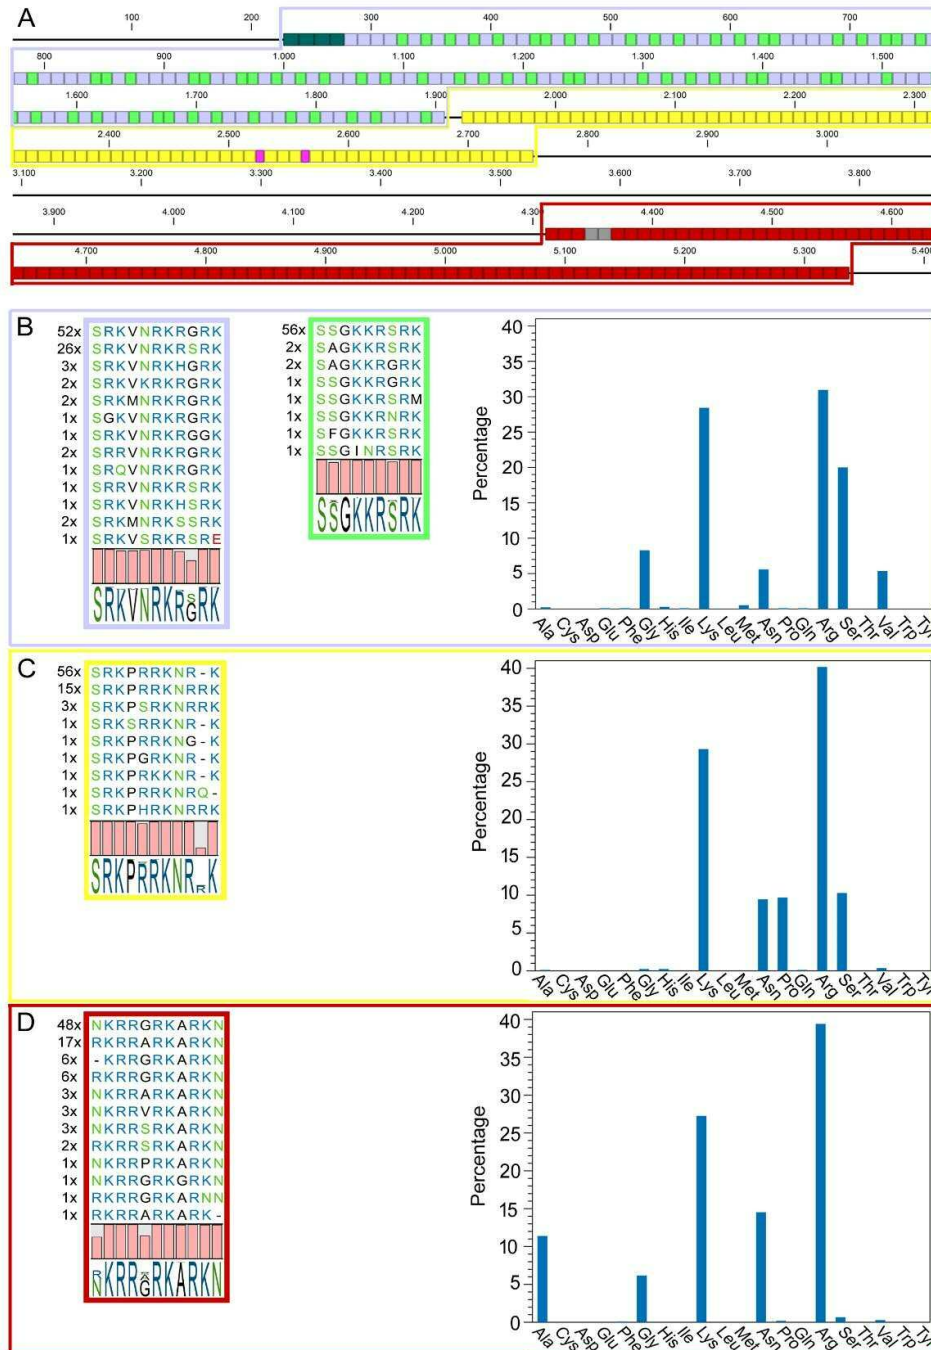

**Fig. S1. Organization of Lysine-Arginine repeats in Mlig-ap1**

(A) schematic illustration of Mlig-ap1 protein sequence. The three Lysine-Arginine rich repeat regions are highlighted in purple-green (KR region A), yellow (KR region B) and red (KR region C). (B-D) alignments of the different KR-rich repeats. Diagrams indicate the percentage of amino acids in the repeats. Amino acids are color-coded according to polarity colors: green neutral polar, black neutral nonpolar, red acidic polar, blue basic polar.

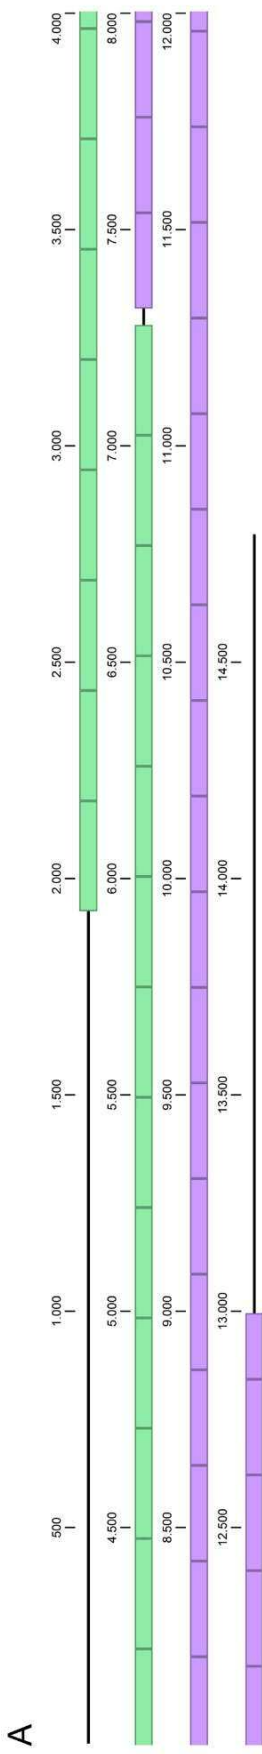

A

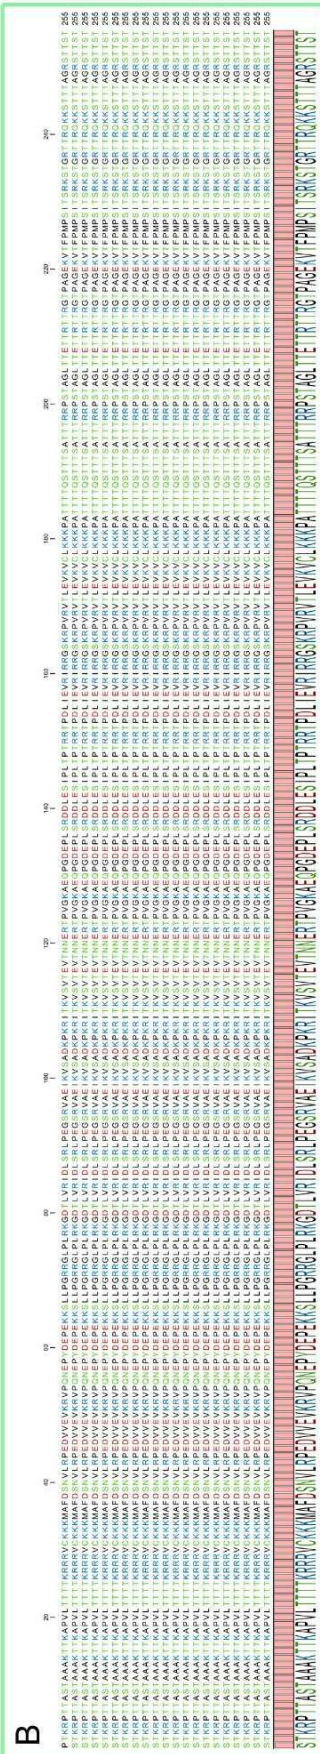

B

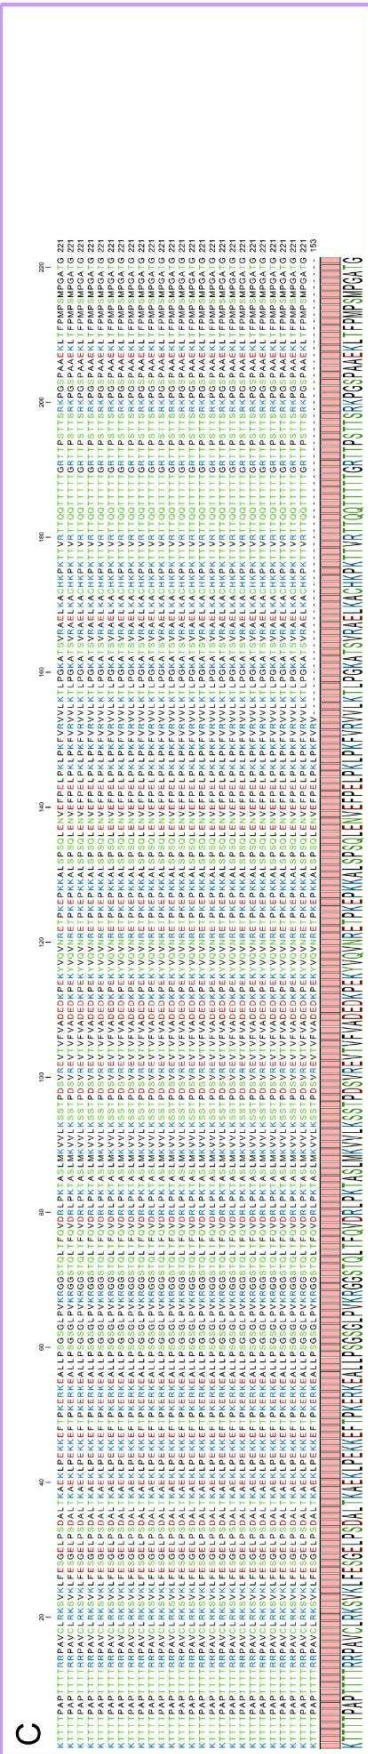

C

**Fig. S2. Organization of Repeat A and Repeat B in Mlig-ap2**

(A) schematic illustration of Mlig-ap2 protein sequence. Repeat region A is colored in green, repeat region B in purple. (B) alignment of repeat A, (C) alignment of repeat B. Amino acids are color-coded according to Polarity colors: green neutral polar, black neutral nonpolar, red acidic polar, blue basic polar.

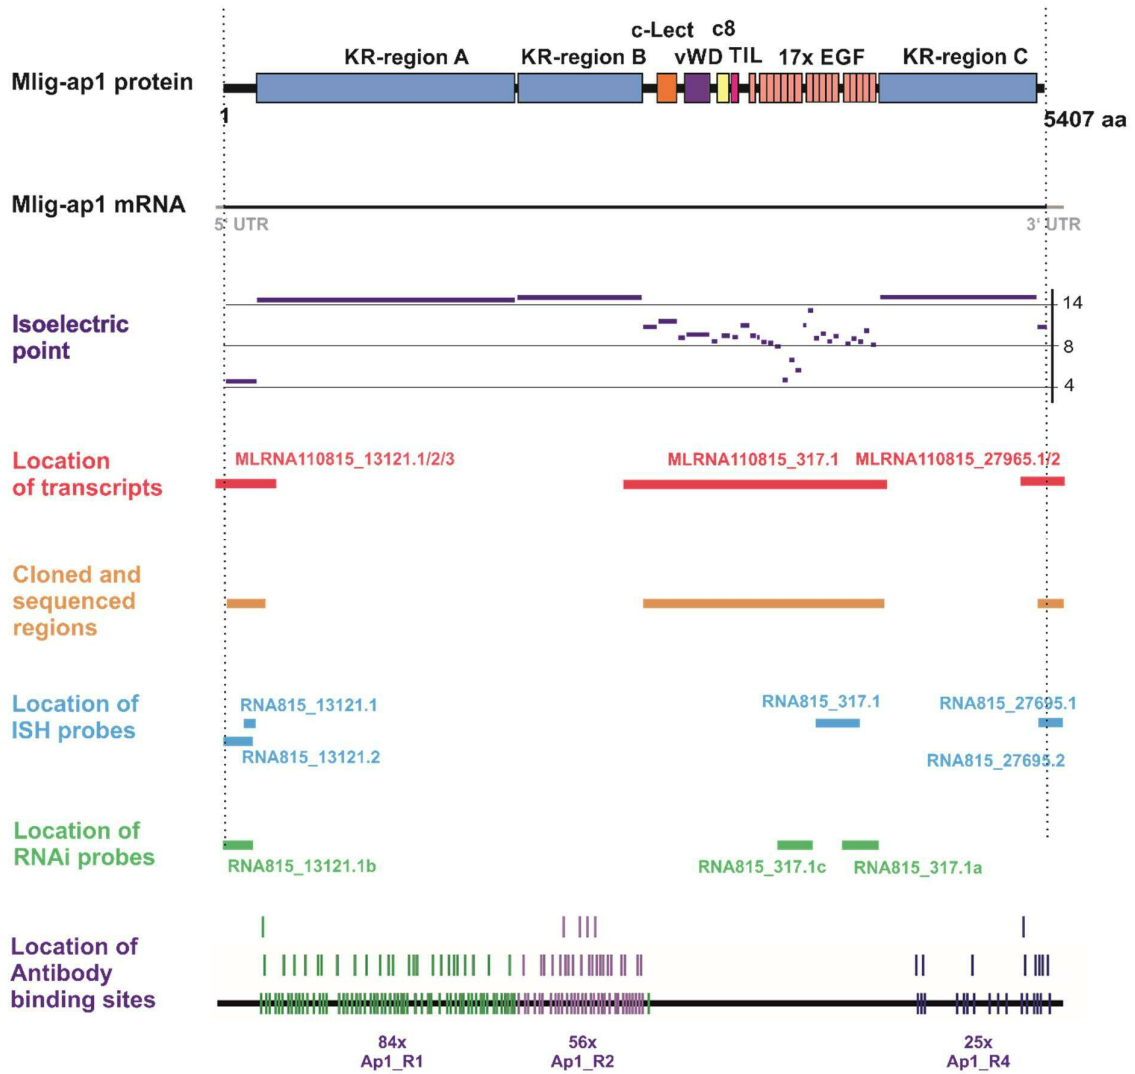

**Fig. S3. Mlig-ap1 at a glance**

Schematic illustration of Mlig-ap1 protein with the isoelectric point of protein regions and domains, location of according transcripts found in the transcriptome MLRNA110815, cloned regions, location of *in situ* hybridization probes and RNAi target sites as well as Antibody binding sites. *aa* amino acids, *C8* domain of 8 conserved Cysteines, *c-Lect* C-type lectin binding domain, *EGF* epidermal growth factor-like domain, *KR region* Lysine-Arginine rich repeat region, *TIL* Trypsin inhibitor-like domain, *vWD* von Willebrand domain.

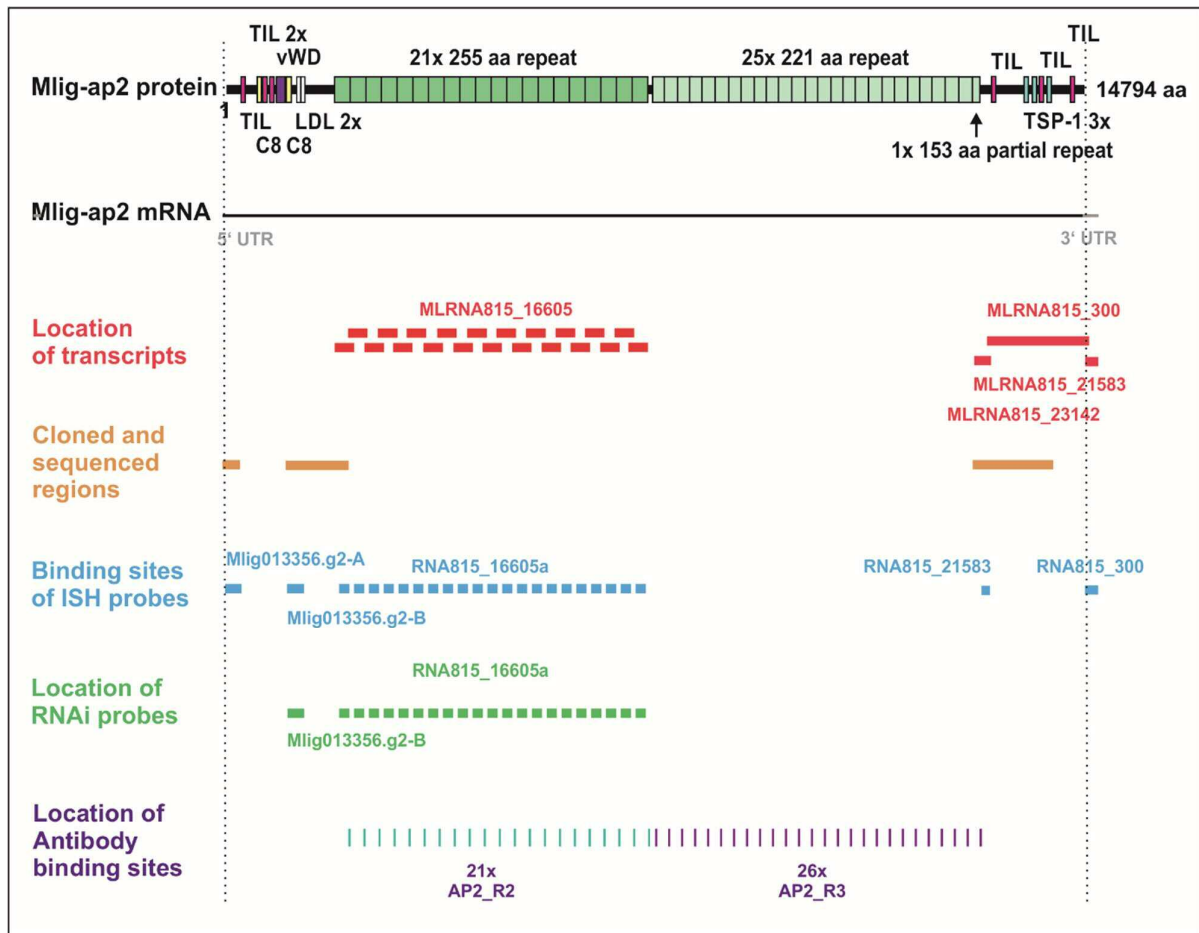

**Fig. S4. Mlig-ap2 at a glance**

Schematic illustration of Mlig-ap2 protein with the location of according transcripts found in the transcriptome MLR815, cloned regions, location of *in situ* hybridization probes and RNAi target sites as well as antibody binding sites. *aa* amino acids, *C8* domain of 8 conserved Cysteines, *LDL* low-density lipoprotein receptor-like domain, *TSP-1* Thrombospondin-1-like domain, *TIL* Trypsin inhibitor-like domain, *vWD* von Willebrand domain.

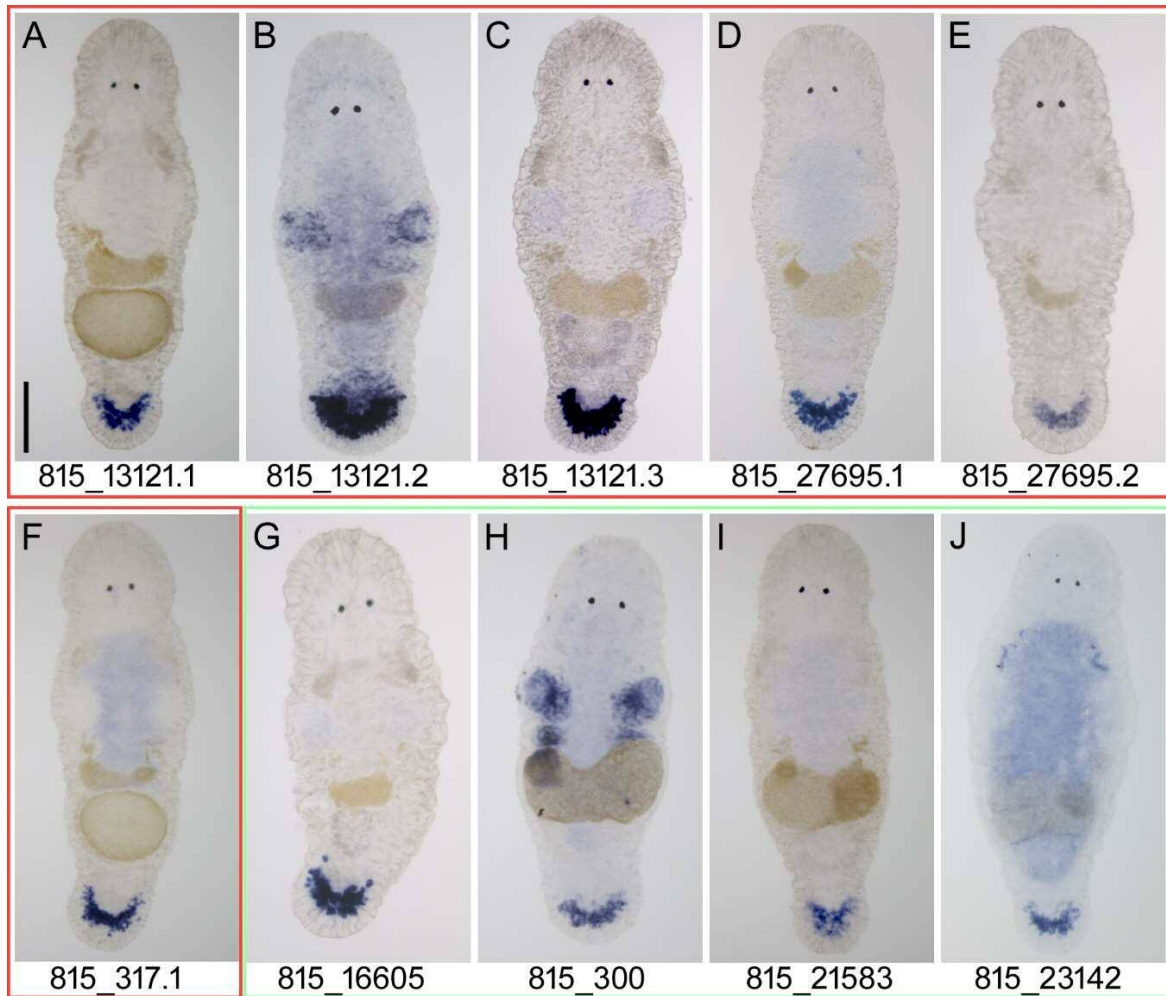

**Fig. S5. Multiple *in situ* hybridization probes confirm the expression of both adhesive genes in adhesive organs**

Independent transcripts of the MLRNA110815 transcriptome (1) are partial sequences of Mlig-ap1 (red frame) or Mlig-ap2 (green frame) and are expressed in the adhesive gland cells. This panel corroborates the expression of these transcripts in earlier *in situ* hybridization screens (2, 3). *In situ* hybridization with different probes belonging to Mlig-ap1 and Mlig-ap2. (A-F) *in situ* probes generated according to transcriptomic data that target Mlig-ap1 expression (red frame). (G-J) *in situ* probes made using transcripts all belonging to Mlig-ap2 (green frame). Scale bar: 100  $\mu$ m.

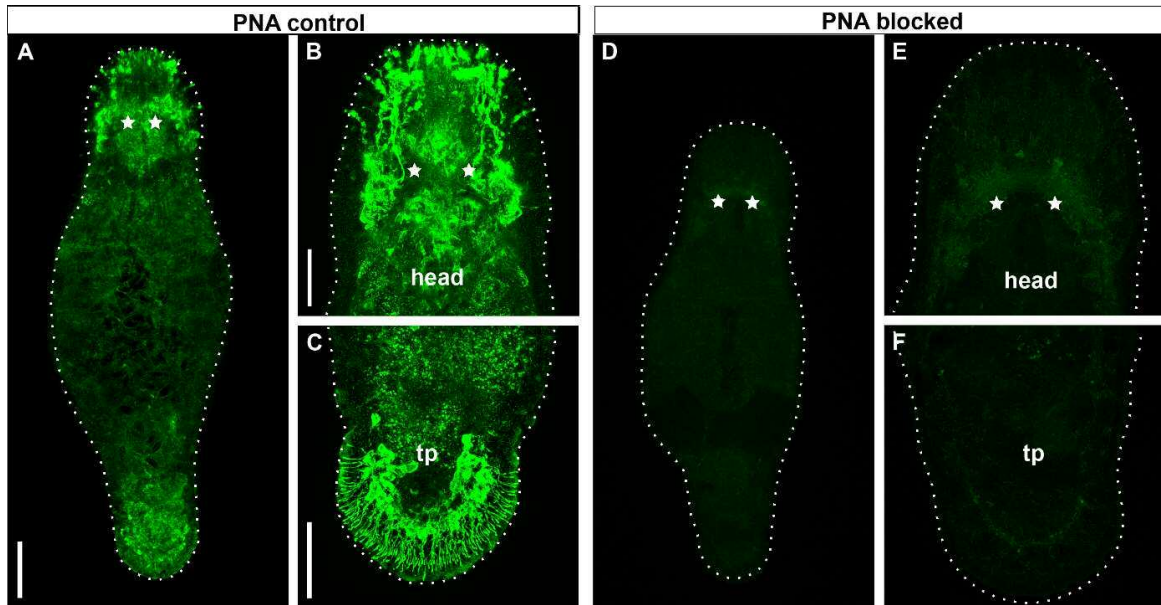

**Fig. S6. Specificity of PNA labelling in *Macrostomum lignano***

Confocal projection (A-C) control PNA labelling with strong signal in frontal glands in the head region (B) and adhesive glands in the tail plate (C). (D-E) Labelling with PNA pre-incubated with 0.4 M D-galactose. Note that no fluorescent signal can be detected in the frontal glands (E) or the adhesive glands. Dotted white lines indicate the outline of the animals, white stars indicate the region of the eyes. *tp* tail plate. Scale bars: 100  $\mu$ m (A), 50 $\mu$ m (B, C).



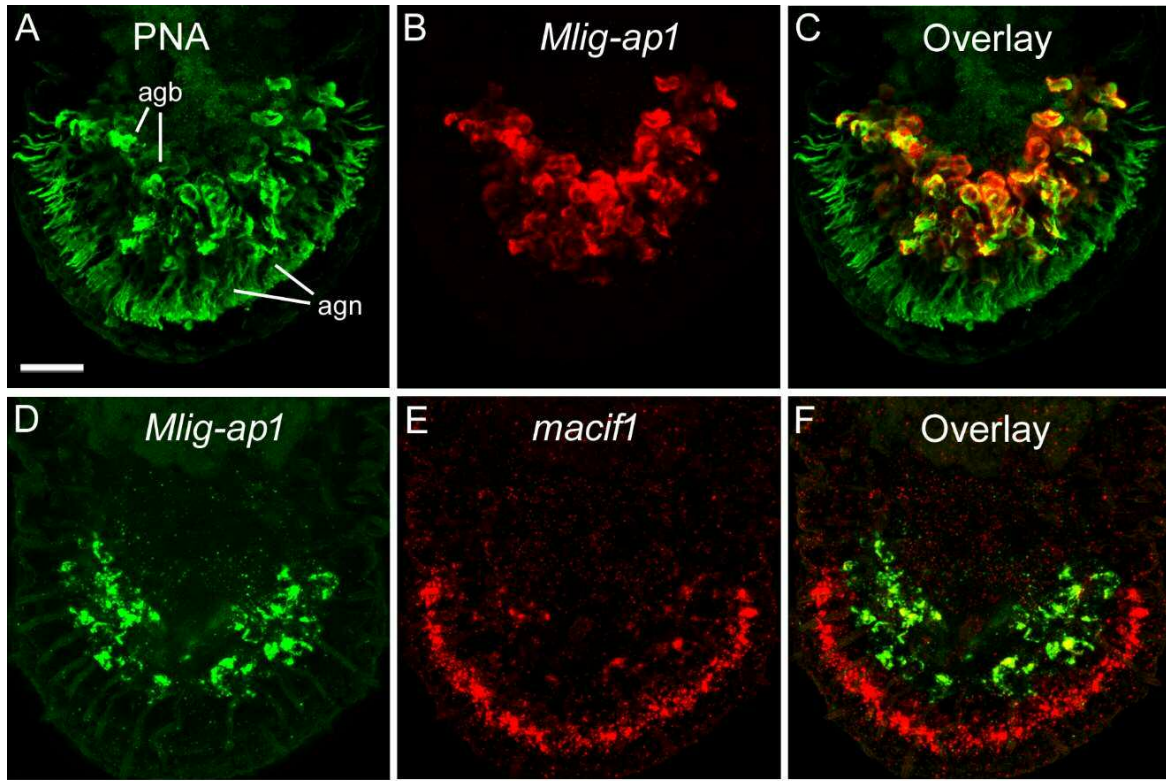

**Fig. S7. Coexpression of Mlig-ap1 and Mlig-ap2**

Confocal projection: (A-C) PNA labelling of Mlig-ap2 (green) combined with fluorescence in situ hybridization for *Mlig-ap1* (red). Note that the expression of *Mlig-ap1* RNA is restricted to adhesive gland cell bodies while PNA labels adhesive gland vesicles in the cell bodies and the adhesive gland necks. (D-F) double fluorescence *in situ* hybridization for *Mlig-ap1* (green, in adhesive gland cell bodies) and *macif1* (red, in anchor cells) (4). *agb* adhesive gland body, *agn* adhesive gland neck. Scale bar: 20  $\mu$ m

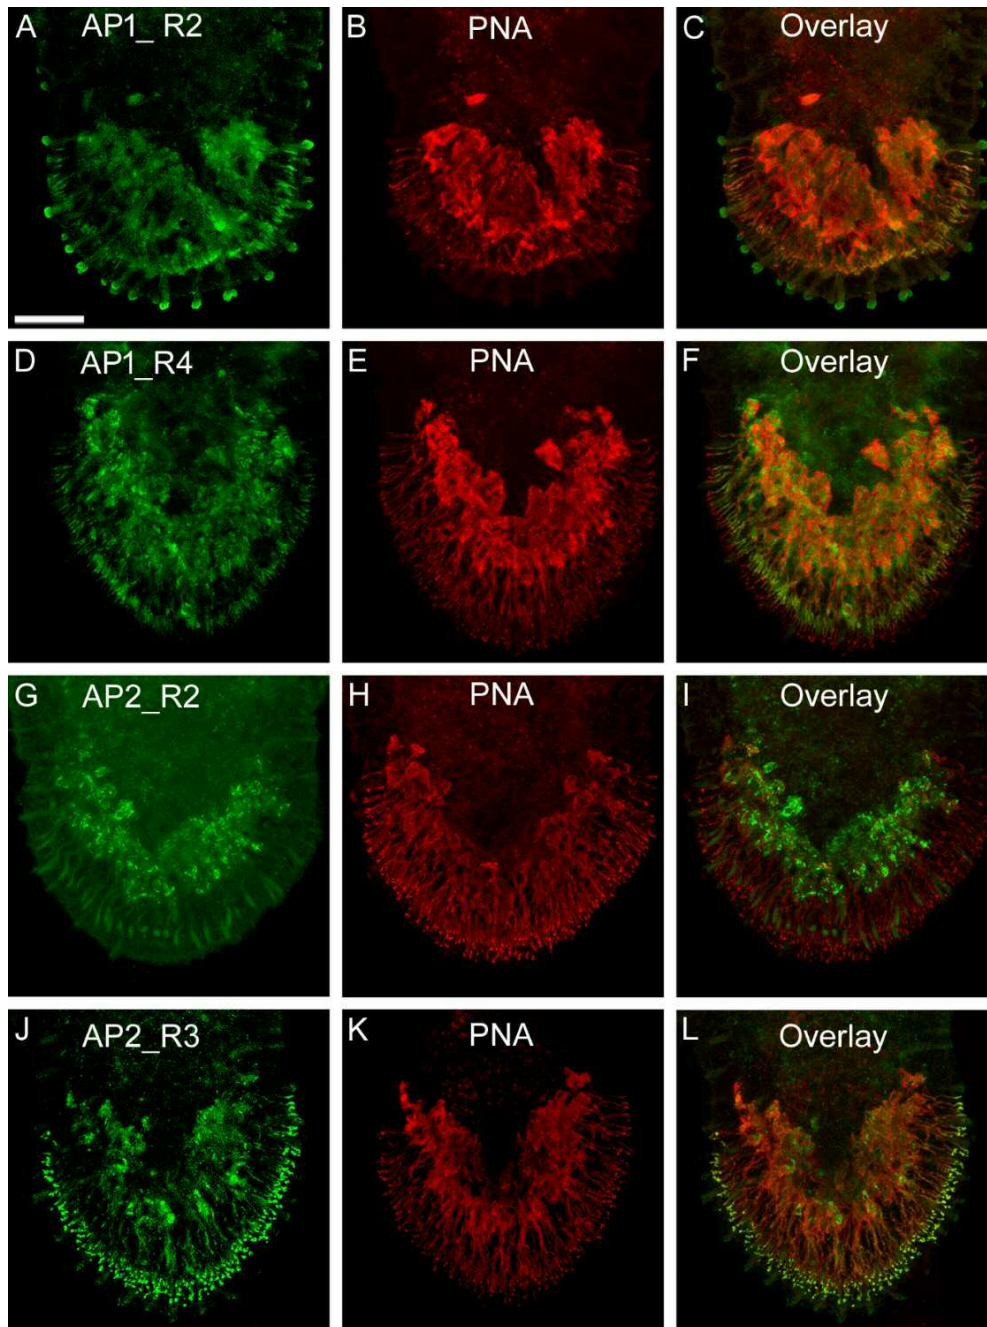

**Fig. S8. Staining of Mlig-ap1 and Mlig-ap2 with Antibodies**

Confocal projections of double labelling with antibodies against Mlig-ap1 or Mlig-ap2 combined with PNA staining. (A-C) antibody binding to Mlig-ap1 KR region B (green) and PNA (red). (D-F) Antibody raised against Mlig-ap1 KR region C and PNA. (G-I) antibody against Mlig-ap2 repeat 1 and PNA. (J-L) Antibody binding to Mlig-ap2 repeat 2 and PNA. For location of antibody binding sites of Mlig-ap1 and Mlig-ap2 see Figs. S3 and S4, respectively. Scale bar: 40  $\mu$ m.

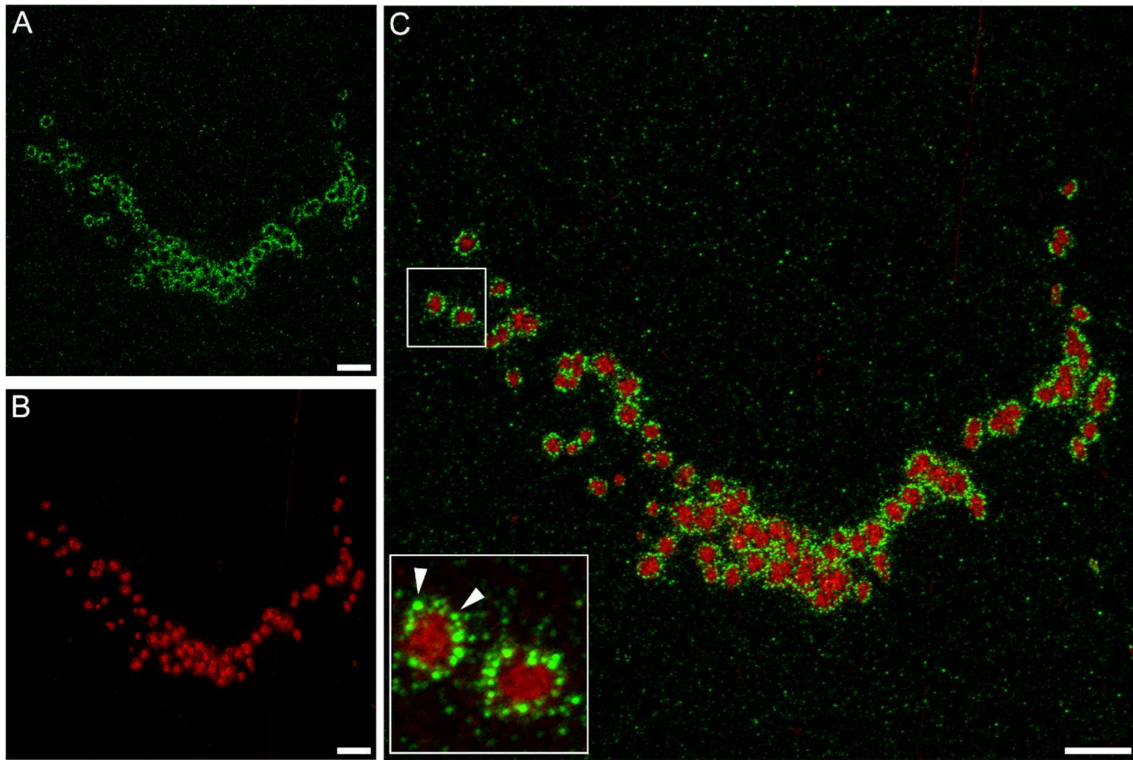

**Fig. S9. Footprint labelled with Mlig-ap1 and Mlig-ap2**

Confocal projection of double-labelled footprint with antibody against Mlig-ap1 KR region A (A) and PNA (B). White rectangle in the overlay (C) indicates the area of enlargement (inset). Note the dot-like labelling of Mlig-ap1 surrounding the PNA-positive Mlig-ap2 (white arrowheads). Scale bar: 10  $\mu\text{m}$ .

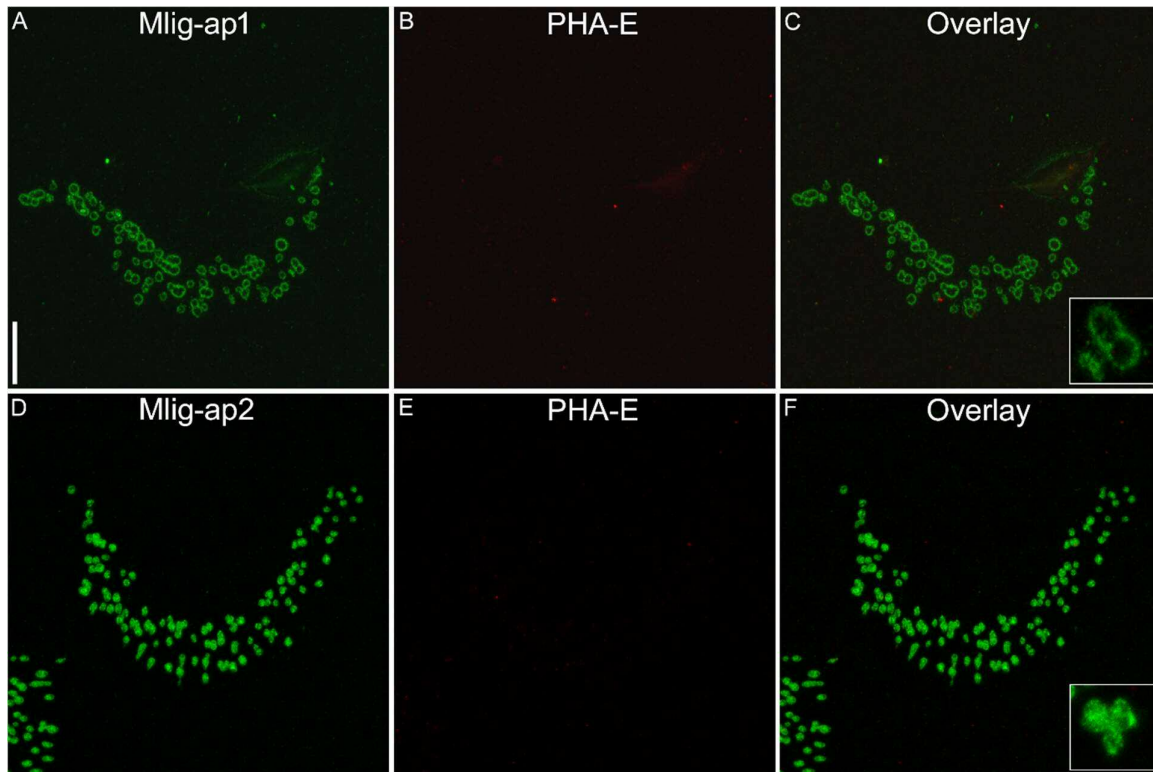

**Fig. S10. Labelling of footprints after detachment**

Confocal projection (A-C), footprints double-labelled with Antibody against Mlig-ap1 and PHA-E (4). (D-F) footprints double-labelled with Antibody against Mlig-ap2 and PHA-E. The lack of PHA-E staining indicated that no glycocalyx of the microvilli remained on the footprint. Scale bars: 20  $\mu$ m.



Mlig-ap2:

MKLLTAVVAAQLLLACTCGAAGAPEDSEPQWRYCLQTGLAHLDFRGRWSSEFRPGGEAALASFTSEVLNWRVEVGTGVS GDC  
GEDGAAEDACRKEIIVHFRGVPRCTDTRVVISIRGRSVRVVQLDTRGRNSRTVAELRLGDSGDDDDDLRPAVPLLLRSFDS  
GRQHSLSLHSGTGLHLRWSDDGFLALLLLESSAAAAASSTGRTGGWCAGERPPPAPREGRTDAKRRRVRPANRGPGRRLDRPDGR  
LARSLRDSFVEVAGSAAAYATARRFLSSRGRDCNSGGRSAGACRDRGRAVLSLCHRRCPDRCAALRRLPFLMCALAPLACAP  
PRLLDLRGRGCVVEAEPCRHGNRIYHRGERFTKDCQTCSCLGNNWRCASSDCGRVCLATPGQVVTFDGQKISFV DNRNDYLI  
EPDDSKIPLAVKFSRSSPARLEVSWQGGQVLVYHRPATDSESGDFFIQLGDRSQKLAIGEHLRVGLGFFLHRVTSHYIRLRVAD  
LLRVDFNGGTVELAASRRLRGARRLRGLCGRYDGSSENDLWPRRGRAAADSLSVARSYLVAIS PAGGPKRTTISREAVRTCYD  
LFQHSQGQFRCARTENLQPFRLNCEAAGDRDSVCYIAFNAMRLCARSYKIHWRLLPQLRNCALLACPRGGSSFRLCANTCQAT  
CASLARPDRCPSGCFYGCQCPRGRYLMADGRVCVTKSQCTCFDSATGRQRPGEKFSRRNENCKCQDGRAVCQAAQASANGRA  
CPKNQVWRRAPGEGECWPRRCEPDKDGRSCQSPDSAAEERCRCPAGLFATDSGLCVNRSDPCRYGGRELLTGSVLTACQCPGRV  
CSSGRWLNRAAESSSDSCGRGRCRAFGDGYVVSFDGRAFRYAGSRETRLLQLPQLRVATRVCAGSSRPSVLCARLVKIRLAG  
GDEIRVLQGRRIIAGLRHVDGEAVLTATAALGGLHFLRIGVSVWDRGTRLTINARPRSGQPIGGLCGSFNGDATDDYRTPGG  
LLALSPDEFGRSWTLESDYAQPIPESEYDQGLKSRNF DWSFARCGLLRDQRGPFGRCLSVLNE DRLEFLHDA CLREACR  
TVKDAANCDGLCNLMAAADEACAGLNVTVDWRSAAFCPYNCEGTAYTSCGQLQSFVVFANGPDVQCLEDRCRMGGQWTAAG  
SCTEASHVCRYRAAVYQGTDSAKLGCRCQCTREGKWI RCNDKDCYRNTTIELNLSSTVAPCTGHSAFACRNSDACLHRSKVC  
PDCSDGSDMESCEGCPAFKLCRRSNLCAKSEVCDGKHQCR LGNSTDDSD EENCATGATTSAPQKPIEGTDCYRPLLQSG  
IKESQVRITENFAPTHGYRAEELLSRKRYPYLLSKGRVTFELRLSPAGSAVRVSVLLQIQSNHRRGLKAI RLYANSNKTWQLL  
EAKESNIACRCLIKLNKLPFAAEKLFKFIQSRSSMKIQLEINGCPGQNLSESGRCRRLPATACTIVKYKSI TYNREYSGEESR  
LVLPRTEYSLLNQSSEIVIGVPEMVRICAVI IKSPLPSDGKPTANVVSFVYDKLSELTLVSKLP ISTNTTTITISKPTNEYK  
AVLYSKDP IRISIEIQVKKQPVTKNEPKQKQIACKGSLPDESVGKVRVLRMTALDSRQEYTSQDRRQLLRKGAALSSGRTDVL  
VQFSLKQTDVIEALQVLTTPGADAKVTARELQLCTRDRC SKVMSTPSVQQTNMVIRARARFLKILDSPTSRYAKNAKLF  
FCSRNKPHVCKERYLERCNVPLMKSITFGKRYDAYTVKALLQGRPVRLLRGYTKITLINLNLAESVILKKTGGRPLKLIISLT  
TTNEKRRTTITKFTDVS AKLPTGYTKMITIKSKEPSKALFKECKQPNKIPNREP TAAHTTTIAPATTTLEPTKRP  
STAAAKTTKAPVLT TTTKRRRVCKKKMAFDSNVLRPEDVVEVK RVPQNEPYDEPEKK SLLPGRGLPLRK GDTLVRIDLSRLPE  
GSRVAEIK VSADKPKRITK VSVTEVTNNER TPVGKAEQPGDEPLSRDDLES I PLTPTRRTPDLIEVR IRRGSKRPVRVTLEVKV  
CLKKKPATTTTQSTTTSATTTTRRPSTAGLTETTRTRTRGTPAGEKVTFFMPSITSRKSTGRTRTRQKSTTTAGRSTTSTKRP  
TTASTAAAKTTKAPVLT TTTKRRRVCKKKMAFDSNVLRPEDVVEVK RVPQNEPYDEPEKK SLLPGRGLPLRK GDTLVRIDLSR  
LPEGSRVAEIK VSADKPKRITK VSVTEVTNNER TPVGKAEQPGDEPLSRDDLES I PLTPTRRTPDLIEVR IRRGSKRPVRVTLE  
VKVCLKKKPATTTTQSTTTSATTTTRRPSTAGLTETTRTRTRGTPAGEKVTFFMPSITSRKSTGRTRTRQKSTTTAGRSTTST  
KRPTTASTAAAKTTKAPVLT TTTKRRRVCKKKMAFDSNVLRPEDVVEVK RVPQNEPYDEPEKK SLLPGRGLPLRK GDTLVRID  
LSRLPEGSRVAEIK VSADKPKRITK VSVTEVTNNER TPVGKAEQPGDEPLSRDDLES I PLTPTRRTPDLIEVR IRRGSKRPVRV  
TLEVKVCLKKKPATTTTQSTTTSATTTTRRPSTAGLTETTRTRTRGTPAGEKVTFFMPSITSRKSTGRTRTRQKSTTTAGRSTTS  
TSTKRPTTASTAAAKTTKAPVLT TTTKRRRVCKKKMAFDSNVLRPEDVVEVK RVPQNEPYDEPEKK SLLPGRGLPLRK GDTLV  
RIDLSRLPEGSRVAEIK VSADKPKRITK VSVTEVTNNER TPVGKAEQPGDEPLSRDDLES I PLTPTRRTPDLIEVR IRRGSKRP  
VRVTLEVKVCLKKKPATTTTQSTTTSATTTTRRPSTAGLTETTRTRTRGTPAGEKVTFFMPSITSRKSTGRTRTRQKSTTTAGRS  
TTSTSTKRPTTASTAAAKTTKAPVLT TTTKRRRVCKKKMAFDSNVLRPEDVVEVK RVPQNEPYDEPEKK SLLPGRGLPLRK GDT  
LVRIDLSRLPEGSRVAEIK VSADKPKRITK VSVTEVTNNER TPVGKAEQPGDEPLSRDDLES I PLTPTRRTPDLIEVR IRRG  
SKRPVRVTLEVKVCLKKKPATTTTQSTTTSATTTTRRPSTAGLTETTRTRTRGTPAGEKVTFFMPSITSRKSTGRTRTRQKSTTTA  
GRSTTSTSTKRPTTASTAAAKTTKAPVLT TTTKRRRVCKKKMAFDSNVLRPEDVVEVK RVPQNEPYDEPEKK SLLPGRGLPLR  
K GDTLVRIDLSRLPEGSRVAEIK VSADKPKRITK VSVTEVTNNER TPVGKAEQPGDEPLSRDDLES I PLTPTRRTPDLIEVR IR  
RGSKRPRVTLEVKVCLKKKPATTTTQSTTTSATTTTRRPSTAGLTETTRTRTRGTPAGEKVTFFMPSITSRKSTGRTRTRQKST  
TTAGRSTTSTSTKRPTTASTAAAKTTKAPVLT TTTKRRRVCKKKMAFDSNVLRPEDVVEVK RVPQNEPYDEPEKK SLLPGRGL  
PLRK GDTLVRIDLSRLPEGSRVAEIK VSADKPKRITK VSVTEVTNNER TPVGKAEQPGDEPLSRDDLES I PLTPTRRTPDLIEV  
R IRRGSKRPVRVTLEVKVCLKKKPATTTTQSTTTSATTTTRRPSTAGLTETTRTRTRGTPAGEKVTFFMPSITSRKSTGRTRTRQ  
KSTTTAGRSTTSTSTKRPTTASTAAAKTTKAPVLT TTTKRRRVCKKKMAFDSNVLRPEDVVEVK RVPQNEPYDEPEKK SLLPGR  
RGLPLRK GDTLVRIDLSRLPEGSRVAEIK VSADKPKRITK VSVTEVTNNER TPVGKAEQPGDEPLSRDDLES I PLTPTRRTPDL  
IEVR IRRGSKRPVRVTLEVKVCLKKKPATTTTQSTTTSATTTTRRPSTAGLTETTRTRTRGTPAGEKVTFFMPSITSRKSTGR  
TRTRQKSTTTAGRSTTSTSTKRPTTASTAAAKTTKAPVLT TTTKRRRVCKKKMAFDSNVLRPEDVVEVK RVPQNEPYDEPEKK SLL  
PGRGLPLRK GDTLVRIDLSRLPEGSRVAEIK VSADKPKRITK VSVTEVTNNER TPVGKAEQPGDEPLSRDDLES I PLTPTRR  
T PDLIEVR IRRGSKRPVRVTLEVKVCLKKKPATTTTQSTTTSATTTTRRPSTAGLTETTRTRTRGTPAGEKVTFFMPSITSRKST  
GRTRTRQKSTTTAGRSTTSTSTKRPTTASTAAAKTTKAPVLT TTTKRRRVCKKKMAFDSNVLRPEDVVEVK RVPQNEPYDEPEKK  
SLLPGRGLPLRK GDTLVRIDLSRLPEGSRVAEIK VSADKPKRITK VSVTEVTNNER TPVGKAEQPGDEPLSRDDLES I PLTP  
RTRTPDLIEVR IRRGSKRPVRVTLEVKVCLKKKPATTTTQSTTTSATTTTRRPSTAGLTETTRTRTRGTHGGGGEKVTFFMPSITS  
RKSTGRTRTRQKSTTTAGRSTTSTSTKRPTTASTAAAKTTKAPVLT TTTKRRRVCKKKMAFDSNVLRPEDVVEVK RVPQNEPYD  
EPEKK SLLPGRGLPLRK GDTLVRIDLSRLPEGSRVAEIK VSADKPKRITK VSVTEVTNNER TPVGKAEQPGDEPLSRDDLES I  
PLTPTRRTPDLIEVR IRRGSKRPVRVTLEVKVCLKKKPATTTTQSTTTSATTTTRRPSTAGLTETTRTRTRGTPAGEKVTFFMPS  
ITSRKSTGRTRTRQKSTTTAGRSTTSTSTKRPTTASTAAAKTTKAPVLT TTTKRRRVCKKKMAFDSNVLRPEDVVEVK RVPQNE  
PYDEPEKK SLLPGRGLPLRK GDTLVRIDLSRLPEGSRVAEIK VSADKPKRITK VSVTEVTNNER TPVGKAEQPGDEPLSRDDI  
ES I PLTPTRRTPDLIEVR IRRGSKRPVRVTLEVKVCLKKKPATTTTQSTTTSATTTTRRPSTAGLTETTRTRTRGTPAGEKVTFF  
MPSITSRKSTGRTRTRQKSTTTAGRSTTSTSTKRPTTASTAAAKTTKAPVLT TTTKRRRVCKKKMAFDSNVLRPEDVVEVK RVP  
QNEPYDEPEKK SLLPGRGLPLRK GDTLVRIDLSRLPEGSRVAEIK VSADKPKRITK VSVTEVTNNER TPVGKAEQPGDEPLSR  
DDLES I PLTPTRRTPDLIEVR IRRGSKRPVRVTLEVKVCLKKKPATTTTQSTTTSATTTTRRPSTAGLTETTRTRTRGTPAGEK  
VTFFMPSITSRKSTGRTRTRQKSTTTAGRSTTSTSTKRPTTASTAAAKTTKAPVLT TTTKRRRVCKKKMAFDSNVLRPEDVVEVK  
RVPQNEPYDEPEKK SLLPGRGLPLRK GDTLVRIDLSRLPEGSRVAEIK VSADKPKRITK VSVTEVTNNER TPVGK

continued

AEQPGDEPLSRDDLESIPLTPTRRTPDLIEVRIIRGSKRPVVRTLEVKVCLKKKPATTTTQSTTTSATTTTRRSTAGLTTETR  
 TTRGTPAGEKVTFFMPSITSRKSTGRTRQKKSTTAGRSTTSTSTKRPTTASTAAAKTTKAPVLTITTKRRRVCKKMAFDSN  
 VLRPEDVVEVKRVPQNEPYDEPEKISLLPGRGRLPLRKGDTLVRIIDLRLPEGSRVAEIKVSADKPKRITKVSVTEVTNNERTP  
 VGKAEQPGDEPLSRDDLESIPLTPTRRTPDLIEVRIIRGSKRPVVRTLEVKVCLKKKPATTTTQSTTTSATTTTRRSTAGLTTE  
 TTRTRTRGTPAGEKVTFFMPSITSRKSTGRTRQKKSTTAGRSTTSTSTKRPTTASTAAAKTTKAPVLTITTKRRRVCKKMAF  
 DSNVLRPEDVVEVKRVPQNEPYDEPEKISLLPGRGRLPLRKGDTLVRIIDLRLPEGSRVAEIKVSADKPKRITKVSVTEVTNNE  
 RTPVGKAEQPGDEPLSRDDLESIPLTPTRRTPDLIEVRIIRGSKRPVVRTLEVKVCLKKKPATTTTQSTTTSATTTTRRSTAGL  
 TTETTRTRGTPAGEKVTFFMPSITSRKSTGRTRQKKSTTAGRSTTSTSTKRPTTASTAAAKTTKAPVLTITTKRRRVCKK  
 MAFDSNVLRPEDVVEVKRVPQNEPYDEPEKISLLPGRGRLPLRKGDTLVRIIDLRLPEGSRVAEIKVSADKPKRITKVSVTEVT  
 NNERTPVGKAEQPGDEPLSRDDLESIPLTPTRRTPDLIEVRIIRGSKRPVVRTLEVKVCLKKKPATTTTQSTTTSATTTTRRST  
 AGLTTETRTRTRGTPAGEKVTFFMPSITSRKSTGRTRQKKSTTAGRSTTSTSTKRPTTASTAAAKTTKAPVLTITTKRRRVCK  
 KMAFDSNVLRPEDVVEVKRVPQNEPYDEPEKISLLPGRGRLPLRKGDTLVRIIDLRLPEGSRVAEIKVSADKPKRITKVSVTE  
 VTNNERTPVGKAEQPGDEPLSRDDLESIPLTPTRRTPDLIEVRIIRGSKRPVVRTLEVKVCLKKKPATTTTQSTTTSATTTTR  
 PSTAGLTTETRTRTRGTPAGEKVTFFMPSITSRKSTGRTRQKKSTTAGRSTTSTSTKRPTTASTAAAKTTKAPVLTITTKRR  
 RVCKKMAFDSNVLRPEDVVEVKRVPQNEPYDEPEKISLLPGRGRLPLRKGDTLVRIIDLRLPEGSRVAEIKVSADKPKRITK  
 VSVTEVTNNERTPVGKAEQPGDEPLSRDDLESIPLTPTRRTPDLIEVRIIRGSKRPVVRTLEVKVCLKKKPATTTTQSTTTSAT  
 TRRSTAGLTTETRTRTRGTPAGEKVTFFMPSITSRKSTGRTRQKKSTTAGRSTTSTSTKRPTTASTAAARTNASLLTMTK  
 TKILPSIRVSSRRKTTTTPAPTTTTRRPAVCLRKSVKLFESGELPSDALTKAEKLEPEKKEFTPKEKKEALLPSGSGLPVKRGG  
 SQTFTFOVDRLPKTASLMKVVLKSSTPDSVREVTVFVADEDKPEKYVQVNRTPKEPKKALSPSQLENVEFFPELPLPKFVVRV  
 VILPGLKATSVRAELKACHKPKTTVVRTTQQTITTTGRTTTPSTTSRKPGSPAEEKLTFPMPMPGATGKTTTTPAPTTTTRRPAV  
 LRKSVKLFESGELPSDALTKAEKLEPEKKEFTPKEKKEALLPSGSGLPVKRGGSTQFTFOVDRLPKTASLMKVVLKSSTPDSVRE  
 VTFVADEDKPEKYVQVNRTPKEPKKALSPSQLENVEFFPELPLPKFVVRVVLKTLPGKATSVRAELKACHKPKTTVVRTTQQT  
 TTTGRTTTPSTTSRKPGSPAEEKLTFPMPMPGATGKTTTTPAPTTTTRRPAVCLRKSVKLFESGELPSDALTKAEKLEPEKKEFT  
 PKERKEALLPSGSGLPVKRGGSTQFTFOVDRLPKTASLMKVVLKSSTPDSVREVTVFVADEDKPEKYVQVNRTPKEPKKALSP  
 SQLENVEFFPELPLPKFVVRVVLKTLPGKATSVRAELKACHKPKTTVVRTTQQTITTTGRTTTPSTTSRKPGSPAEEKLTFPMPMP  
 GATGKTTTTPAPTTTTRRPAVCLRKSVKLFESGELPSDALTKAEKLEPEKKEFTPKEKKEALLPSGSGLPVKRGGSTQFTFOVDR  
 LPKTASLMKVVLKSSTPDSVREVTVFVADEDKPEKYVQVNRTPKEPKKALSPSQLENVEFFPELPLPKFVVRVIVQILAEMSTN  
 VSLDLFSCQDDFYPCMNCTHNGTSYIEGSIIVSLNGVCKDHHVCRKRSWEPLYDCSSWSSWSNCSSECDAGFKTRMKICRSFRD  
 LIARQNLTSLEKCFNQVEREPCFNRRCSKTECNPAEWGWPSPSCGECSTLLSERKRQPGSAVLSSEFCCKVQLPESRLCPKTEK  
 LCKDPNAAWNNSNQPFCTCGHLEQSACVMTSACVPGCACKPGYYLQDGRVCPQSCRCPLPTTLAISTTALTPSTGAAA  
 ALFVSYSSPKARIRGTAAPDKISMLIPDLNLLIPALPTIIVGGGASKPADGADLKSSTSVSVGAKTNPATSSSQAPRIRGTAAPD  
 RASMLIPMLPGKPAATPVKPAATATAPTPTTPVIRGTAAPDGVNLLIPTLSLGSAAANTTMAPSTTVPTTAAASVSTVASVN  
 GIPAAPNAATPFAGFAPGVTSGSSGFTVKGFVSPAQGLGKANTMGAFRVTSLLNMKRP PPPPPRPGGNHGRFQHSFAFLPK  
 FHLPAFSGRPAFRLPGFKFPFPAFRPPGGSGFGKFNPGKRVFRLPGAGSFNPPGKPGTKNSPVPVTPAAASPAQPVTPKSS  
 ASTPAPPGLKPVPSGQASVAPTKPTTKAPVPMSSQGTRIRGTAADDRVDLRIPTLPNLLPLPSPRTKLFTRKSTPSTRSMP  
 SIGPHTSATAKRKLTSAAPVTSKPLRPSFPGIPPAGPHAPGGQSSPATPKKPTTVVTTSMTGTRATNSWVMIGGSNCTCTSG  
 KTTTCVGGHEDSLAAWSTWTAWNSCAHCGQKQYRFRQCSGPACVGNHANESEACTGVDYCYVFSRAKLQWLLTDDYYHAEMW  
 VERDGKPLGSSPLETVNDGRLESGSVLQVGLRCTCKDGGFACKLQRCASDCQWSAWQPWATCSATCGGGLQTRLRTHKPAV  
 ADGAPQASGFTDTQACNLDPGCSWSWSQWSNCTGSATSDIIVRERRRQPIGSCKEADRDLPQCLRPAQSKCKPGQLHSA  
 CHNVTGCEVACAGANARTLCSQTDACLSCGLCPKQVMGPNQCVATDKRCLPKSINCSNCFKPVCLNGQPTCLPDMNCQRL  
 YTEWSAWSACSAACGELSHRTRQLLQEGRRPAGCGKSDLIETRHCRNARPCGYACKDRNGDLYTEGQAMPALDQCSMFCFRANR  
 TECVSKAKVGEVPTPVWSAWSTWSSCVSAAANNRRQERRRRCVRI CPDDPRKCGEFFDKEESVEWKAACLPKTPLLKRDICVSP  
 DWIEGTCYANCMVRSAVARGFRTLYRRIQLPANGGAPCPELRRREDVPCTKTCPVDCSQTAWSAWGACVRASNSGCSGLQVRSR  
 GVLVPPANGGRACEDAKQLRSLAPGCQTSACRAPMTKQPLQQSRCIVRCSLDASEDKAPVQAANAANAANATVACAPAGQYEQ  
 DGRCAKQACRCRWNEELMGQRSPGTREEFAGGERLVMGCKNCTQDGVFKCNRLSSCSDECHWSNWRPEGKCTAGCRKPLGLQ  
 KFVRSRPNSDYLPTKACQGPSVKYELCSSTRSCDSLCPGQRYNEFGECDEQCYASGLGQPQRQRCPEQACVCARGLVKRGDS  
 CVPKSECYKCSSGNTTLPDGGYSVDLAACQIVTCDKGRSAVPLSVQMPACSLADERIAQSAPKAKDPNRCCYRASASACSRE  
 EVSISKLDDSCLLTSPIRVPHCRGQCPQASPLIAPRRSDVVAEVAADSSQVYLLKLPGAHCTGCLPDRVQYSPITLTVCKKS  
 GESRQLRMPIVGACHCKQVPCPSTA

**Fig. S12. Peptides found in mass spectrometry for Mlig-ap2**

Peptides identified by Mass Spectrometry. Color code: **Footprints Trypsin;** **Footprints LysC;** **Footprints V8**

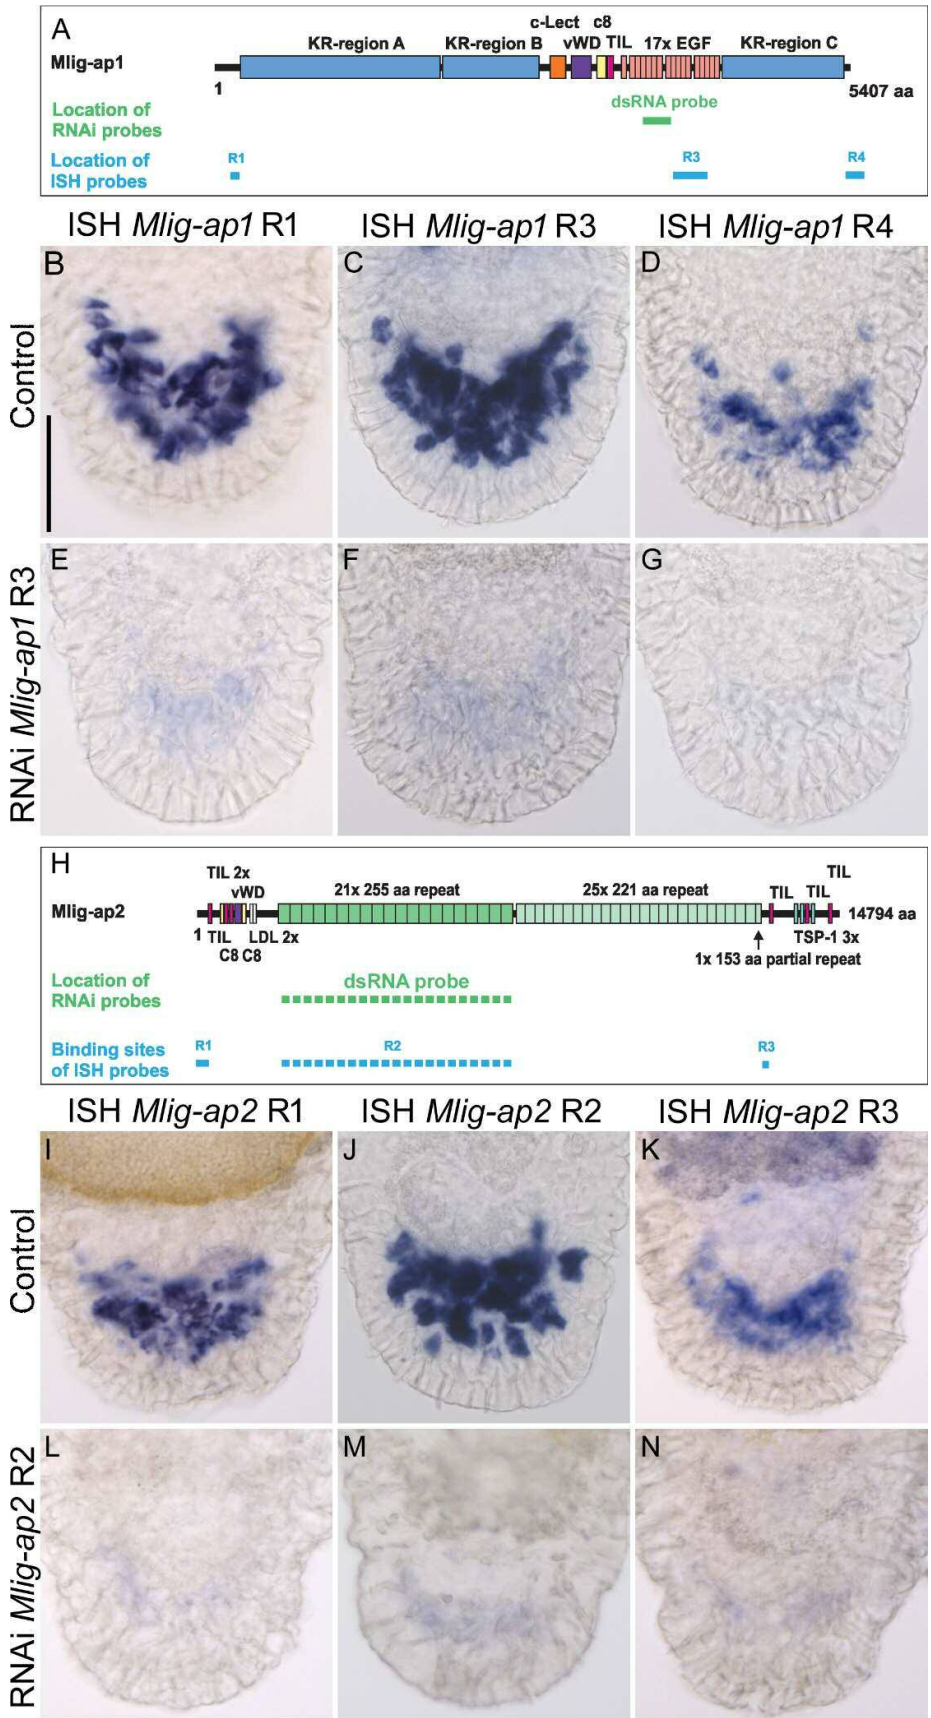



**Fig. S13. RNAi knock-down of Mlig-ap1 and Mlig-ap2**

(A) schematic illustration of Mlig-ap1 protein with location of RNAi probes and different *in situ* hybridization probes. (B-G) RNAi experiment for Mlig-ap1. *Mlig-ap1* expression in the tail region shown by three different *in situ* hybridization probes (R1, R2, R4) in control animals (B-D) and dsRNA treated animals (E-G). (H) schematic illustration of Mlig-ap2 protein with location of dsRNA probe and *in situ* hybridization probes (R1, R2, R3). (I-N) RNAi experiment for Mlig-ap2. *In situ* hybridization in the tail region against three different regions of Mlig-ap2 in control animals (I-K) and dsRNA treated animals (L-N). Scale bar: 50  $\mu$ m.

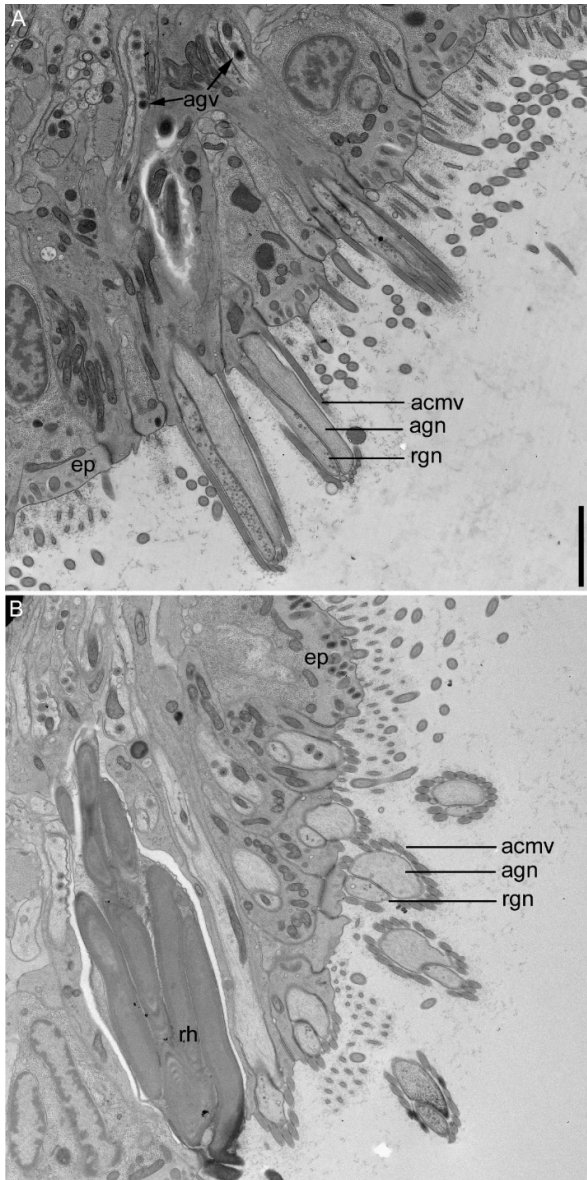

**Fig. S14. Empty adhesive glands after mechanical disturbance of animals**

(A, B) ultrastructural analysis (TEM) of adhesive organs immediately after mechanically disturbing animals for 5 minutes in longitudinal (A) and cross section (B). Note that no adhesive vesicles can be found in the tips of adhesive glands. However, vesicles are still present in the cell bodies of the adhesive gland cells (A, black arrows). Notably, other adhesive organs of the same animals exhibited vesicles in the adhesive gland cell tip. *acmv* anchor cell microvilli, *agn* adhesive gland neck, *ep* epidermis, *rgn* releasing gland neck, *rh* rhabdite. Scale bar: 2  $\mu$ m.

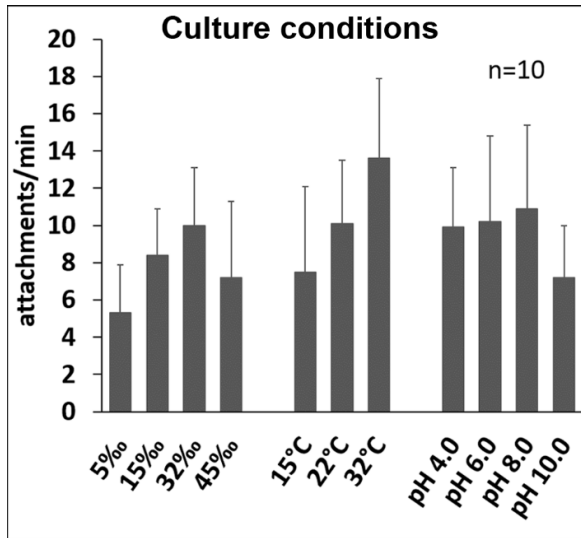

**Fig. S15. Attachment ability of *Macrosotomum lignano* in different culture conditions**  
 Average number of attachments per minute under different culture conditions (salinity, temperature, and pH). Scale bars indicate SD (n=10).

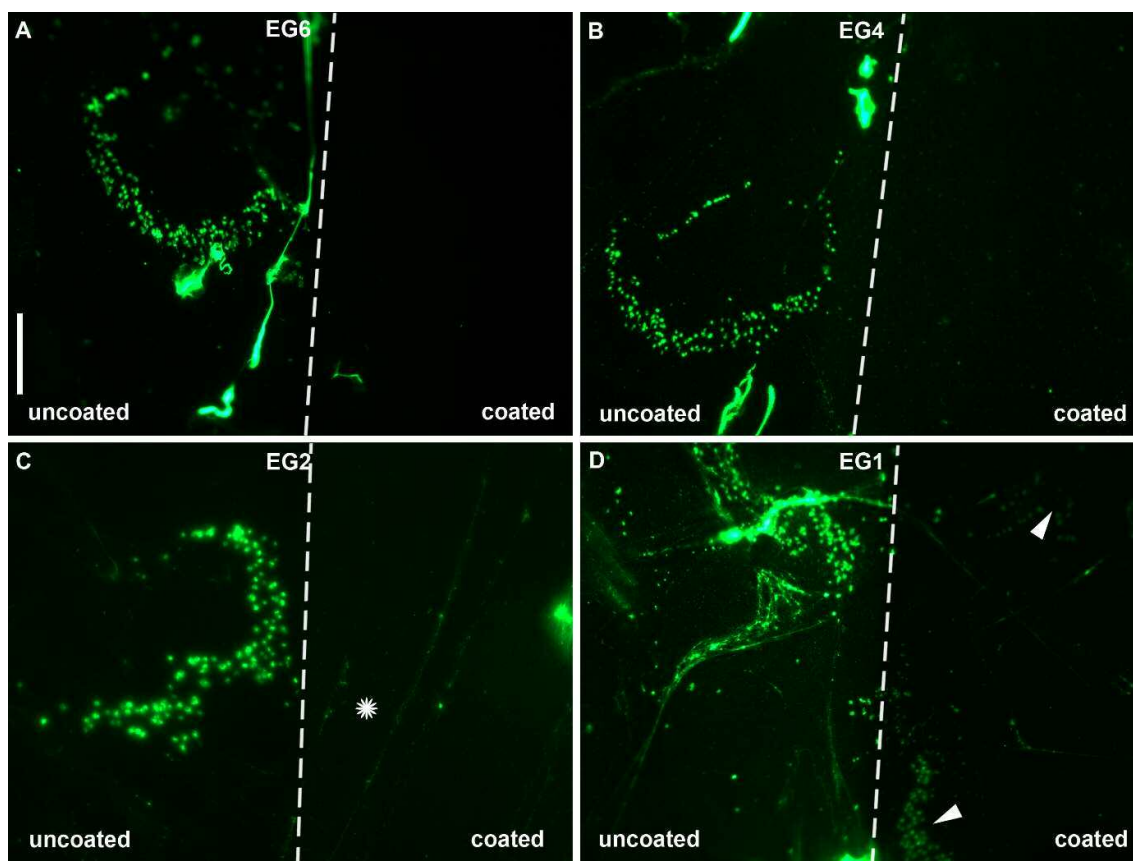

**Fig. S16. Adhesion of *M. lignano* with decreasing hydration of surfaces**

Fluorescence images of footprints stained with PNA on SAMs with decreasing hydration from EG6 (A) to EG1 (D). White dotted indicate the border from coated to uncoated area. Note that on EG6, EG4 and EG2 footprints can only be found on the uncoated areas (A-C). White stars in C indicate adhering mucus on the EG2 coated area. White arrowheads in D indicate footprints in EG1-coated area. Scale bar: 50  $\mu\text{m}$ .

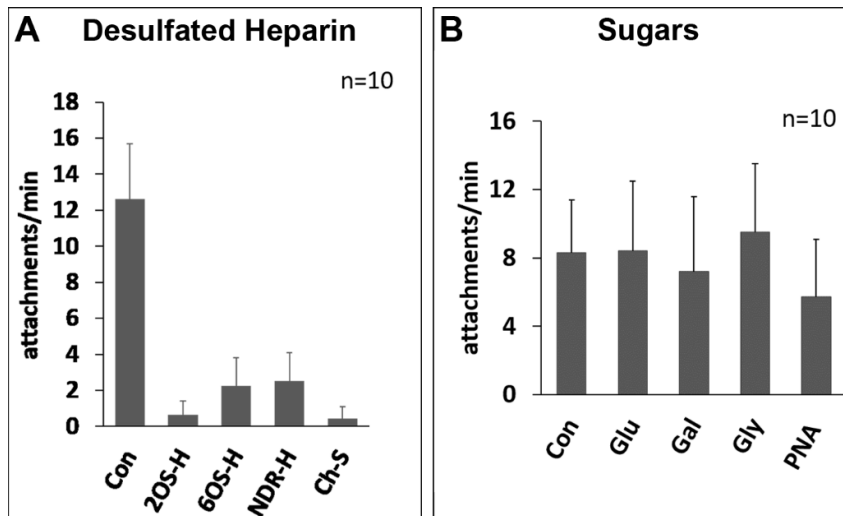

**Fig. S17. Interference of attachment with sulfated sugars**

(A) average number of attachments per minute with 2% of 2-O-desulfated- (2OS-H), 6-O-desulfated- (6OS-H), N-desulfated-re-N-acetylated- (NDR-H) Heparin, and Chondroitin Sulfate (Ch-S), respectively. (B) average number of attachments per minute with 10mM Glucose, 10mM Galactose, 100mM Glycine, and 10 $\mu$ g/ml PNA added to the ASW respectively. Scale bars indicate SD (n=10).

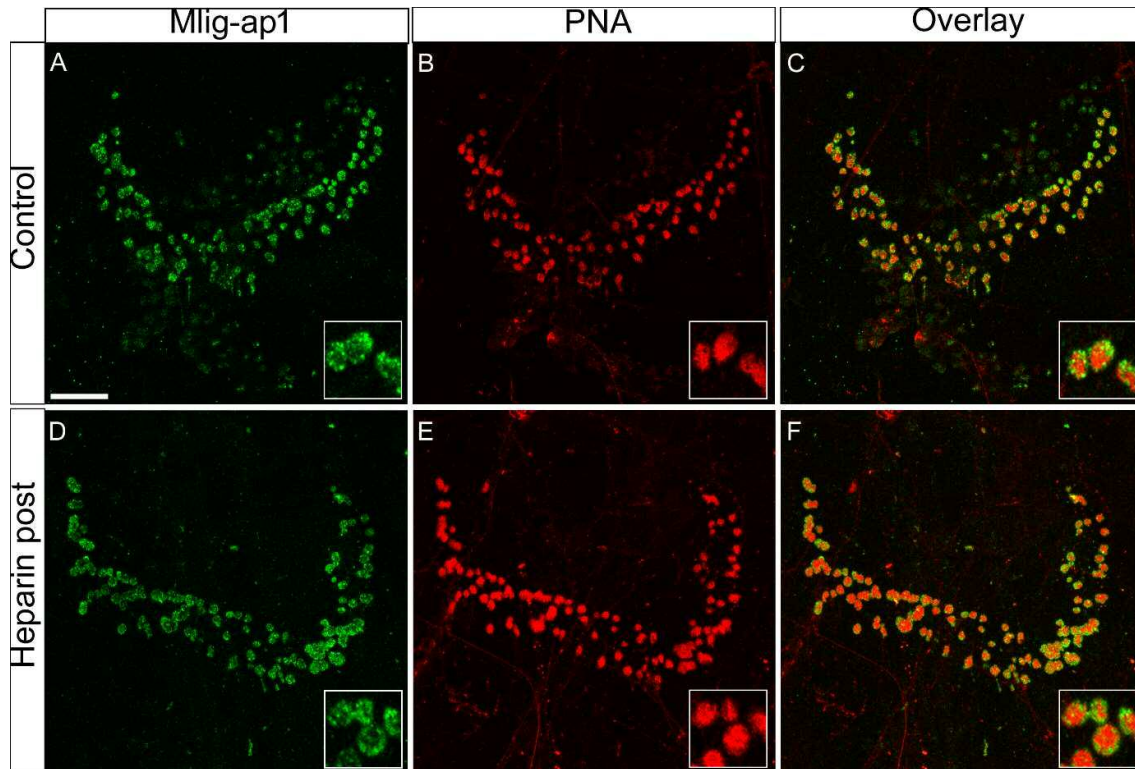

**Fig. S18. Heparin treatment on deposited footprints**

Confocal projection of double labelling with Mlig-ap1 antibody (green) and for Mlig-ap2 by Lectin PNA (red) on footprints. (A-C) control footprints. (D-F) footprints were treated with 2% Heparin in ASW. Note that Mlig-ap1 is present - in contrast to footprints where Heparin was added to the medium before footprint collection. Scale bar: 2  $\mu$ m.

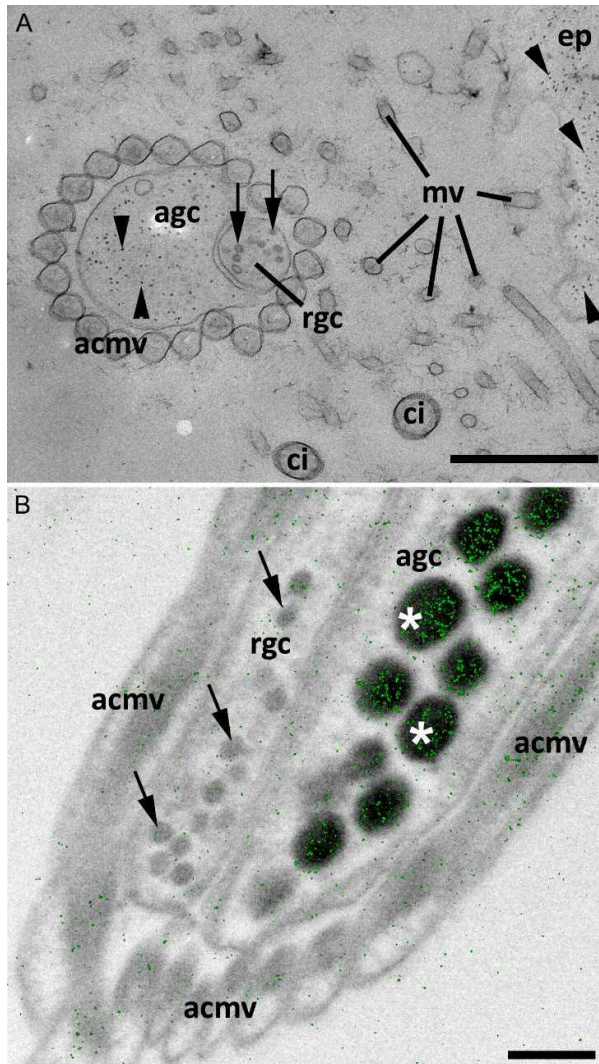

**Fig. S19. Labelling of carbohydrates and nitrogen distribution in adhesive gland cells.**

Distribution of polysaccharides (A) shown by Periodic Acid-Thiocarbohydrazide- Silverproteinate staining (PAS) (TEM). The staining indicates the presence of carbohydrates in the releasing vesicles (arrows). Glycogen (arrowheads) is stained in the epidermal cell and in the adhesive gland cell. (B) Recording of nitrogen distribution in false color (green) in ultrathin sections by Electron Spectroscopic Imaging (ESI). Comparatively little nitrogen (i.e. reflecting protein) is present in the releasing vesicles (arrows) in relation to the high nitrogen (i.e. protein) content (green) of the adhesive vesicles (asterisk). *acmv* anchor cell microvilli; *agc* adhesive gland cell; *ci* cilium; *ep* epidermal cell; *mv* microvilli; *rgc* releasing gland cell. Scale bars: (A) 1  $\mu$ m, (B) 200 nm.

**Table S1. Attachment assays**

Attachments per minute upon addition of different chemicals to the culture medium. Conditions and concentrations where animals showed an unnatural overall behavior were not counted (labelled with red).

| Category               | Individuals                                 | Adhesion within 1 minute |    |    |    |    |    |    |    |    |    | 10 Average | STDEV | Comment             |
|------------------------|---------------------------------------------|--------------------------|----|----|----|----|----|----|----|----|----|------------|-------|---------------------|
|                        |                                             | 1                        | 2  | 3  | 4  | 5  | 6  | 7  | 8  | 9  | 10 |            |       |                     |
| Control                | control ASW                                 | 5                        | 5  | 10 | 8  | 5  | 8  | 11 | 5  | 6  | 11 | 7.4        | 2.5   |                     |
|                        | control ASW                                 | 10                       | 5  | 4  | 4  | 3  | 12 | 5  | 4  | 11 | 7  | 6.5        | 3.3   |                     |
|                        | control ASW                                 | 13                       | 9  | 6  | 6  | 11 | 5  | 9  | 12 | 8  | 4  | 8.3        | 3.1   |                     |
|                        | D-Glucose 10-8M in ASW                      | 7                        | 7  | 10 | 15 | 12 | 8  | 10 | 5  | 3  | 5  | 8.2        | 3.6   |                     |
|                        | D-Glucose 10-6M in ASW                      | 4                        | 13 | 20 | 9  | 6  | 7  | 6  | 6  | 3  | 3  | 7.9        | 5.1   |                     |
|                        | D-Glucose 10-4M in ASW                      | 4                        | 13 | 4  | 8  | 9  | 3  | 17 | 18 | 14 | 3  | 9.3        | 5.9   |                     |
|                        | D-Glucose 10-2M in ASW                      | 2                        | 4  | 12 | 14 | 12 | 11 | 5  | 11 | 5  | 8  | 8.4        | 4.1   |                     |
|                        | D-Galactose 10-8M in ASW                    | 7                        | 13 | 8  | 9  | 16 | 8  | 10 | 11 | 2  | 3  | 8.7        | 4.2   |                     |
|                        | D-Galactose 10-6M in ASW                    | 4                        | 8  | 5  | 6  | 2  | 11 | 3  | 9  | 13 | 5  | 6.6        | 3.6   |                     |
|                        | D-Galactose 10-4M in ASW                    | 12                       | 4  | 4  | 12 | 6  | 3  | 2  | 4  | 3  | 1  | 5.1        | 3.9   |                     |
| Sugars                 | D-Galactose 10-2M in ASW                    | 17                       | 7  | 7  | 8  | 11 | 7  | 5  | 0  | 5  | 5  | 7.2        | 4.4   |                     |
|                        | D-Galactose 0.1M in ASW                     | 2                        | 6  | 9  | 7  | 7  | 5  | 5  | 5  | 6  | 4  | 5.6        | 1.9   | unnatural behaviour |
|                        | Glycogen 0.05M in ASW                       |                          |    |    |    |    |    |    |    |    |    |            |       | unnatural behaviour |
|                        | PNA lectin 50µg/ml in ASW                   | 5                        | 2  | 2  | 4  | 2  | 7  | 4  | 2  | 3  | 8  | 3.9        | 2.2   |                     |
| Lectin                 | PNA lectin 10µg/ml in ASW                   | 7                        | 4  | 3  | 3  | 5  | 3  | 1  | 5  | 1  | 2  | 3.4        | 1.9   |                     |
|                        | PNA lectin 5µg/ml in ASW                    | 11                       | 10 | 4  | 6  | 7  | 2  | 9  | 2  | 3  | 3  | 5.7        | 3.4   |                     |
|                        | PNA lectin 500µg/ml in ASW                  | 2                        | 4  | 4  | 2  | 1  | 1  | 2  | 1  | 1  | 1  | 1.5        | 1.2   | unnatural behaviour |
|                        | Glycine 1M in ASW                           |                          |    |    |    |    |    |    |    |    |    |            |       | unnatural behaviour |
| Neurotransmitter       | Glycine 1M in ddH2O                         | 15                       | 12 | 6  | 4  | 16 | 8  | 11 | 5  | 9  | 9  | 9.5        | 4.0   |                     |
|                        | Glycine 0.1M in ASW                         |                          |    |    |    |    |    |    |    |    |    |            |       | unnatural behaviour |
|                        | Glutamate 5% in ASW                         |                          |    |    |    |    |    |    |    |    |    |            |       | unnatural behaviour |
|                        | Glutamate 2% in ASW                         |                          |    |    |    |    |    |    |    |    |    |            |       | unnatural behaviour |
| Amino Acids            | Glutamate 1% in ASW                         | 16                       | 18 | 16 | 7  | 11 | 4  | 9  | 14 | 15 | 7  | 11.7       | 4.8   |                     |
|                        | GABA 5% in ASW                              |                          |    |    |    |    |    |    |    |    |    |            |       | unnatural behaviour |
|                        | GABA 2% in ASW                              |                          |    |    |    |    |    |    |    |    |    |            |       | unnatural behaviour |
|                        | GABA 1% in ASW                              |                          |    |    |    |    |    |    |    |    |    |            |       | unnatural behaviour |
| Neurotransmitter       | GABA 0.5% in ASW                            |                          |    |    |    |    |    |    |    |    |    |            |       | unnatural behaviour |
|                        | GABA 0.25% in ASW                           |                          |    |    |    |    |    |    |    |    |    |            |       | unnatural behaviour |
|                        | GABA 0.1% in ASW                            | 12                       | 10 | 4  | 9  | 9  | 12 | 3  | 7  | 14 | 2  | 8.2        | 4.1   |                     |
|                        | Antibody MilF- $\alpha$ 1R1:1:10 in ASW     |                          |    |    |    |    |    |    |    |    |    |            |       | unnatural behaviour |
| Ab's                   | Antibody MilF- $\alpha$ 2 R2 1:10 in ASW    | 12                       | 14 | 6  | 8  | 9  | 7  | 12 | 15 | 5  | 11 | 9.9        | 3.4   |                     |
|                        | Antibody MilF- $\alpha$ 2 R2 1:10 in ASW    | 18                       | 7  | 10 | 16 | 5  | 13 | 10 | 6  | 4  | 10 | 9.9        | 4.7   |                     |
|                        | NaCl 33 Promill + CaCl1.2% in dd H2O        |                          |    |    |    |    |    |    |    |    |    |            |       | unnatural behaviour |
|                        | NaCl 33 Promill + CaCl1.2% in dd H2O        |                          |    |    |    |    |    |    |    |    |    |            |       | unnatural behaviour |
| Ca                     | Heparin 0.5% in ASW                         | 3                        | 1  | 0  | 0  | 0  | 1  | 1  | 0  | 2  | 0  | 0.8        | 1.0   |                     |
|                        | Heparin 1.0% in ASW                         | 2                        | 1  | 0  | 1  | 0  | 1  | 0  | 0  | 0  | 0  | 0.5        | 0.7   |                     |
|                        | Heparin 2.0% in ASW                         | 0                        | 0  | 0  | 0  | 1  | 0  | 1  | 0  | 0  | 0  | 0.2        | 0.4   |                     |
|                        | 2-O-desulfates Heparin 2% in ASW            | 0                        | 0  | 1  | 2  | 1  | 0  | 2  | 0  | 0  | 0  | 0.6        | 0.8   |                     |
| sulfated Carbohydrates | 6-O-desulfated Heparin 2% in ASW            | 3                        | 5  | 2  | 2  | 4  | 1  | 0  | 0  | 3  | 2  | 2.2        | 1.6   |                     |
|                        | N-desulfated Heparin 2% in ASW              |                          |    |    |    |    |    |    |    |    |    |            |       | unnatural behaviour |
|                        | N-desulfated-6-acetylated Heparin 2% in ASW | 4                        | 3  | 4  | 2  | 0  | 3  | 1  | 5  | 1  | 2  | 2.5        | 1.6   |                     |
|                        | Chondroitin Sulfate 2% in ASW               | 0                        | 0  | 1  | 0  | 2  | 0  | 0  | 0  | 0  | 1  | 0.4        | 0.7   |                     |



**Table S2. Primer list**

Primers used for PCR for *in situ* hybridisation Probe synthesis and dsRNA probe synthesis for Mlig-ap1 and Mlig-ap2.

| Mlig-ap1        |                          |                          |
|-----------------|--------------------------|--------------------------|
| Primer Name     | FW Primer                | RV Primer                |
| RNA815_13121.1  | ACAAGTGGCTCCACCAACA      | CTCGAGCGGTTTCGTTTCTCT    |
| RNA815_13121.2  | GAGTCACAGTGGCCTCAAGC     | ACATGCGACTGTCCTTTTGC     |
| RNA815_13121.3  | TTTCCTAGGCTTGCAATGTGC    | TCAGCTAGGCCTTGACATCG     |
| RNA815_317.1    | AAGGCCAATTGTATCAACAAACG  | AAATTTCTTATTGGCGCACTCG   |
| RNA815_27695.1  | AGCGAGGAAGAGTGGACTGAAG   | CTATCATGCGCATTTTGGGTAT   |
| RNA815_27695.2  | AGTGGATTGACGAAGGAGAAGC   | AAGTTGAGACGGGGCAGTAGC    |
| RNA815_13121.1b | TCAGGTAGAAAGTTGACGAAGC   | GTCAATGATGGTTGTCTCATCG   |
| RNA815_317.1a   | CAGAGGAACGACGGCTACG      | AGTCTTTTGGTTTGGTCACAGC   |
| RNA815_317.1c   | CTCTGCGAGGACATCAACG      | TGTAGCCGTCTCCATAGTAACC   |
| Mlig-ap2        |                          |                          |
| Primer Name     | FW Primer                | RV Primer                |
| RNA815_21583    | GCGCGTAATAGTTCAAGTTTGG   | ATTCTGGCAGTTGAACTTCTTGC  |
| RNA815_23142    | ACCCAGCTGAAACATCAGATTGAG | CTTGTGTTTAATCGTCGCACCTG  |
| RNA815_300      | AAGACTACGGACGATTCACAAGC  | CGAAGA ACTCTCCGCACTTCC   |
| RNA815_16605a   | CTGTGCTGACTACAACCACCAAG  | CGATGTCGTAGTACTCTGC GTTG |
| Mlig013356.g2-A | CAATACCCGAGTCCGAGTACG    | TCAATGGGCTTCTTCTGAGG     |
| Mlig013356g2-B  | CTAACTTCTTGGCCCTGTGAAGC  | CCACCTCCACGAAAGAATCG     |

**Table S3.** Advancing and receding contact angles, and ellipsometric thicknesses for the used SAMs.

| SAM | Advancing contact angle (deg) | Receding contact angle (deg) | Ellipsometric thickness (Å) |
|-----|-------------------------------|------------------------------|-----------------------------|
| C16 | 110 ± 1                       | 106 ± 1                      | 20.8 ± 0.5                  |
| MHA | 32 ± 2                        | < 10                         | 22.7 ± 0.4                  |
| NH2 | 35 ± 2                        | < 10                         | 21.2 ± 0.5                  |
| EG1 | 26 ± 1                        | 15 ± 1                       | 24.4 ± 0.4                  |
| EG2 | 31 ± 1                        | 19 ± 1                       | 26.5 ± 0.3                  |
| EG4 | 33 ± 1                        | 25 ± 1                       | 31.4 ± 0.4                  |
| EG6 | 36 ± 1                        | 23 ± 1                       | 37.7 ± 0.5                  |

**Movie S1. adhesive papillae are in contact with surface**

Attachment behaviour of control *M. lignano*, squeezing preparation of a live animal with detailed view on the tail plate.

**Movie S2. RNAi experiment: control animals adhere strongly to substrate**

Live observation of RNAi control *M. lignano* after 9 days of tail regeneration

**Movie S3. RNAi experiment: Mlig-ap1 RNAi leads to non-adhesive phenotype**

Live observation of Mlig-ap1 dsRNA treated *M. lignano* after 9 days of tail regeneration

**Movie S4. RNAi experiment: Mlig-ap2 RNAi leads to non-adhesive phenotype**

Live observation of Mlig-ap2 dsRNA treated *M. lignano* after 9 days of tail regeneration

**Movie S5. RNAi experiment: double RNAi leads to non-adhesive phenotype**

Live observation of Mlig-ap1 and Mlig-ap2 dsRNA treated *M. lignano* after 9 days of tail regeneration

**Movie S6. Adhesive organs are used sequentially**

Live observation of the attachment in a squeezed animal with detailed view on the tail plate

**Movie S7. MgCl<sub>2</sub> hinders the release**

Live observation of *M. lignano* in 80% MgCl<sub>2</sub> in ASW

**Movie S8. 1-Phenoxy-2-Propanol does not impair the release**

Live observation of *M. lignano* in 0,1% 1-Phenoxy-2-Propanol in ASW

**Movie S9. Arginine and Lysine hinder the release**

Live observation of *M. lignano* in 8% Arginine and 3% Lysine in ASW

**Datasets D1, D2, D3 (separate files)**

**Mass spectrometry analyses**

Datasets D1 - D3 are Excel files (Mass Spectrometry analyses output) showing peptides found in different mass spectrometry analyses. Single experiments are displayed on different sheets. Mlig-ap1 and Mlig-ap2 are colored in yellow in all files.

## References

1. Arbore R, et al. (2015) Positional RNA-Seq identifies candidate genes for phenotypic engineering of sexual traits. *Front Zool* **12**:14.
2. Lengerer B, et al. (2018) Organ specific gene expression in the regenerating tail of *Macrostomum lignano*. *Dev Biol* **433**:448–460.
3. Weber M, et al. (2018) A targeted in situ hybridization screen identifies putative seminal fluid proteins in a simultaneously hermaphroditic flatworm. *Bmc Evol Biol* **18**:81.
4. Lengerer B, Hennebert E, Flammang P, Salvenmoser W, Ladurner P (2016) Adhesive organ regeneration in *Macrostomum lignano*. *Bmc Dev Biol* **16**:20.
